# Supplementary material
Source: HighWire-hosted journal article supplement (https://diabetes.diabetesjournals.org/content/suppl/2007/09/19/db06-1749)
Supplement: db061749suppletablenishimuras.pdf [file db061749suppletablenishimuras.pdf]

## Supplemental Table

### Antibodies, dyes, incubation time, and concentration used in the present study

#### A. primary antibodies

|                | <b>vendor</b>            | <b>clone</b> | <b>incubation</b> |
|----------------|--------------------------|--------------|-------------------|
| CD31           | BioLegend                | MEC13.3      | 1:100, 12hrs      |
| CD34           | Santa Cruz Biotechnology | C-18         | 1:100, 12hrs      |
| CD68           | Santa Cruz Biotechnology | T-16         | 1:100, 12hrs      |
| CD133          | Santa Cruz Biotechnology | K-18         | 1:100, 12hrs      |
| F4/80          | Caltag                   | BM8          | 1:100, 12hrs      |
| VEGF           | Santa Cruz Biotechnology | P-20         | 1:100, 12hrs      |
| Ki-67          | Santa Cruz Biotechnology | M-19         | 1:100, 12hrs      |
| HIF-1 $\alpha$ | Santa Cruz Biotechnology | Y-15         | 1:100, 12hrs      |
| perilipin      | Sigma                    | P1873        | 1:250, 12hrs      |
| BrdU           | BD Pharmingen            | 51-23614L    | 1:100, 12hrs      |

#### B. secondary antibodies

|                  | <b>conjugated</b> | <b>incubation</b> |
|------------------|-------------------|-------------------|
| donkey anti-goat | AlexaFluor 488    | 1:200, 1hr        |
| donkey anti-goat | AlexaFluor 568    | 1:200, 1hr        |
| goat anti-rabbit | AlexaFluor 405    | 1:100, 1hr        |
| goat anti-rabbit | AlexaFluor 488    | 1:200, 1hr        |
| rabbit anti-rat  | AlexaFluor 488    | 1:100, 1hr        |

(Molecular Probes)

#### C. dyes

|                                                                          | <b>incubation</b>    |
|--------------------------------------------------------------------------|----------------------|
| <i>Griffonia simplicifolia</i> IB <sub>4</sub> isolectin, AlexaFluor 488 | 20 $\mu$ g/ml, 1hr   |
| <i>Griffonia simplicifolia</i> IB <sub>4</sub> isolectin, AlexaFluor 568 | 20 $\mu$ g/ml, 1hr   |
| Hoechst 33342                                                            | 40 $\mu$ M, 1hr      |
| BODIPY 558/568                                                           | 5 $\mu$ M, 1hr       |
| FM1-43                                                                   | 5 $\mu$ g/ml, 15mins |
| acetylated low-density lipoprotein                                       | 10 $\mu$ g/ml, 1hr   |

(Molecular Probes)
